# Supplementary material for: Comparison of Direct and Indirect Toxoplasma gondii Detection and Genotyping in Game: Relationship and Challenges
Source: MDPI journal article supplement (doi:10.3390/microorganisms9081663), 2021-08-04
Supplement: s1 [file s1]

**Table S2.** Seroprevalence of *Toxoplasma gondii* in wild boar and deer in total as well as by hunting season, age, and sex.

| Game Species. | Variable             | Category               | Seroprevalence in % (No. Positive/ No. Tested; 95% CI) | p-value, Fischer's Exact Test | OR (95% CI)         |
|---------------|----------------------|------------------------|--------------------------------------------------------|-------------------------------|---------------------|
| Wild boar     | Total Hunting season |                        | 20.26 (62/306; 15.9–25.21)                             |                               |                     |
|               |                      | 2017/2018              | 24.14 (28/116; 16.68–32.96)                            | 0.12                          | Reference           |
|               |                      | 2018/2019              | 25.00 (16/64; 15.02–37.40)                             |                               | 1.05 (0.52–2.13)    |
|               |                      | 2019/2020              | 14.66 (17/116; 8.78–22.42)                             |                               | 0.54 (0.28–1.05)    |
|               | Age                  | 2020/2021 <sup>b</sup> | 10 (1/10; 0.25–44.5)                                   | 0.004                         | na                  |
|               |                      | <1 year                | 13.18 (17/129; 7.87–20.26)                             |                               | Reference           |
|               |                      | 1–2 years              | 21.14 (26/123; 14.3–29.42)                             |                               | 1.77 (0.91–3.45)    |
|               |                      | >2 years               | 35.19 (19/54; 22.68–49.38)                             |                               | 3.58 (1.68–7.62)    |
|               | Sex                  | Male                   | 24.82 (34/137; 17.84–32.92)                            | 0.09                          | Reference           |
|               |                      | Female                 | 16.57 (28/169; 11.3–23.05)                             |                               | 0.6 (0.34–1.05)     |
| Roe deer      | Total Hunting season |                        | 10.87 (20/184; 6.77–16.29)                             |                               |                     |
|               |                      | 2017/2018              | 15.69 (8/51; 7.02–28.56)                               | 0.52                          | Reference           |
|               |                      | 2018/2019              | 10.81 (8/74; 4.78–20.20)                               |                               | 0.65 (0.23–1.87)    |
|               |                      | 2019/2020              | 8.16 (4/49; 2.27–19.6)                                 |                               | 0.48 (0.13–1.7)     |
|               | Age                  | 2020/2021 <sup>b</sup> | 0 (0/10; 0–30.85)                                      | < 0.001                       | na                  |
|               |                      | <1 year                | 1.52 (1/66; 0.04–8.16)                                 |                               | Reference           |
|               |                      | 1–2 years              | 6.98 (3/43; 1.46–19.06)                                |                               | 4.88 (0.49–48.49)   |
|               |                      | >2 years               | 21.33 (16/75; 12.71–32.32)                             |                               | 17.63 (2.27–137.04) |
|               | Sex                  | Male                   | 8.33 (5/60; 2.76–18.39)                                | 0.61                          | Reference           |
|               |                      | Female                 | 12.1 (15/124; 6.93–19.17)                              |                               | 1.51 (0.52–4.38)    |
| Fallow deer   | Total Hunting season |                        | 0 (0/80; 0–4.51)                                       |                               |                     |
|               |                      | 2017/2018              | nd <sup>c</sup>                                        | na <sup>c</sup>               | na <sup>c</sup>     |
|               |                      | 2018/2019              | nd <sup>c</sup>                                        |                               | na <sup>c</sup>     |
|               |                      | 2019/2020              | 0 (0/58; 0–6.16)                                       |                               | na <sup>c</sup>     |
|               | Age <sup>a</sup>     | 2020/2021 <sup>b</sup> | 0 (0/22; 0–15.44)                                      | na                            | na <sup>c</sup>     |
|               |                      | <1 year                | 0 (0/22; 0–15.44)                                      |                               | na                  |
|               |                      | 1–2 years              | 0 (0/24; 0–14.25)                                      |                               | na                  |
|               |                      | >2 years               | 0 (0/33; 0–10.58)                                      |                               | na                  |
|               | Sex <sup>a</sup>     | Male                   | 0 (0/30; 0–11.57)                                      | na                            | na                  |
|               |                      | Female                 | 0 (0/49; 0–10.25)                                      |                               | na                  |
| Red deer      | Total Hunting season |                        | 6.15 (4/65; 1.7–15.01)                                 |                               |                     |
|               |                      | 2017/2018              | 7.41 (2/27; 0.91–24.29)                                | 1                             | Reference           |
|               |                      | 2018/2019              | 5.00 (1/20; 0.13–24.87)                                |                               | 0.66 (0.06–7.81)    |
|               |                      | 2019/2020              | 7.68 (1/13; 0.19–36.03)                                |                               | 1.04 (0.09–12.66)   |
|               | Age                  | 2020/2021 <sup>b</sup> | 0 (0/5; 0–52.18)                                       | 0.14                          | na                  |
|               |                      | <1 year                | 0 (0/28; 0–12.34)                                      |                               | Reference           |
|               |                      | 1–2 years              | 7.69 (1/13; 0.01–35.42)                                |                               | 1.08 (0.93–1.27)    |
|               |                      | >2 years               | 12.5 (3/24; 2.66–32.36)                                |                               | 1.14 (0.98–1.33)    |
|               | Sex                  | Male                   | 6.67 (2/30; 0.82–22.07)                                | 1                             | Reference           |
|               |                      | Female                 | 5.71 (2/35; 0.7–19.16)                                 |                               | 0.85 (0.11–6.42)    |

Notes: nd, no data; na, not applicable; <sup>a</sup> Sex and age of one fallow deer was not recorded and could therefore not be included in the analysis. <sup>b</sup> Due to the COVID-19 pandemic only few samples could be obtained in the 2020/2021 hunting season. Therefore, the 2020/2021 hunting season was excluded from analysis. <sup>c</sup> Fallow deer was sampled only in two hunting seasons.
