# Supplementary material for: Comparison of Direct and Indirect Toxoplasma gondii Detection and Genotyping in Game: Relationship and Challenges
Source: MDPI journal article supplement (doi:10.3390/microorganisms9081663), 2021-08-04
Supplement: s1 [file s1]

**Table S3.** Results of qPCR of DNA from 5 g of heart and foreleg muscle tissue from the same individuals.

| DE qPCR foreleg <sup>b</sup> | DE qPCR Heart Muscle Tissue <sup>a</sup> |   |    |       | $\kappa$ (95%) |                |
|------------------------------|------------------------------------------|---|----|-------|----------------|----------------|
|                              |                                          | - | +  | total |                |                |
|                              | Wild boar                                | - | 9  | 1     | 10             | 0.62 (-0.04–1) |
|                              |                                          | + | 0  | 1     | 1              |                |
|                              | Roe deer                                 | - | 3  | 1     | 4              | na             |
|                              |                                          | + | 0  | 0     | 0              |                |
|                              | Red deer                                 | - | 7  | 0     | 7              | na             |
|                              |                                          | + | 0  | 0     | 0              |                |
|                              | Total                                    |   | 19 | 3     | 22             | 0.46 (-0.14–1) |

Notes: <sup>a</sup> qPCR on DNA extracts from 5 g of heart muscle tissue; <sup>b</sup> qPCR on DNA extracts from 5 g of foreleg muscle tissue; na, not applicable.
