# Supplementary material for: Comparison of Direct and Indirect Toxoplasma gondii Detection and Genotyping in Game: Relationship and Challenges
Source: MDPI journal article supplement (doi:10.3390/microorganisms9081663), 2021-08-04
Supplement: s1 [file s1]

**Table S6.** Overview of result combinations observed among individuals that tested positive in at least one direct detection method.

| ELISA Result | DE qPCR Result | PD qPCR Result | MC qPCR Result | Bioassay Result | Total Number of Animals with This Combination |
|--------------|----------------|----------------|----------------|-----------------|-----------------------------------------------|
| +            | +              | +              | +              | +               | 0                                             |
|              | +              | +              | +              | na              | 3                                             |
|              | +              | +              | na             | na              | 3                                             |
|              | +              | na             | na             | na              | 13                                            |
|              | +              | na             | na             | +               | 1                                             |
|              | +              | -              | na             | na              | 1                                             |
|              | -              | +              | na             | na              | 5                                             |
|              | -              | +              | -              | na              | 1                                             |
|              | -              | +              | +              | na              | 1                                             |
|              | -              | -              | +              | na              | 1                                             |
|              | +              | +              | na             | +               | 3                                             |
| -            | +              | na             | na             | na              | 1                                             |
|              | -              | +              | +              | na              | 1                                             |
|              | -              | +              | -              | na              | 1                                             |
|              | -              | -              | +              | na              | 3                                             |

Notes: DE qPCR, qPCR on DNA extracts from 5 g of heart muscle tissue; PD qPCR, qPCR on DNA extracts from pepsin digest of 50 g heart muscle tissue; MC qPCR, qPCR on DNA from magnetic capture of 50 g of heart muscle tissue; na, not applied.
