# Supplementary material for: Comparison of Direct and Indirect Toxoplasma gondii Detection and Genotyping in Game: Relationship and Challenges
Source: MDPI journal article supplement (doi:10.3390/microorganisms9081663), 2021-08-04
Supplement: s1 [file s1]

**Table S4.** Detection of *Toxoplasma gondii* in wild boar and deer with at least one direct detection method.

| Game Species | Variable         | Category               | Proportion of Positive Results in % (No. Positive/ No. Tested; 95% CI) | p-value, Fischer's Exact Test | OR (95% CI)       |
|--------------|------------------|------------------------|------------------------------------------------------------------------|-------------------------------|-------------------|
| Wild boar    | Total            |                        | 11.81 (28/237; 8–16.62)                                                |                               |                   |
|              | Hunting season   | 2017/2018              | 6.49 (5/77; 2.14–14.51)                                                | 0.08                          | Reference         |
|              |                  | 2018/2019              | 19.05 (12/63; 10.25–30.91)                                             |                               | 3.39 (1.12–10.21) |
|              |                  | 2019/2020              | 11.58 (11/95; 5.92–19.77)                                              |                               | 1.89 (0.63–5.68)  |
|              |                  | 2020/2021 <sup>b</sup> | 0 (0/2; 0–84.19)                                                       |                               | na                |
|              | Age              | <1 year                | 7 (7/100; 2.86–13.89)                                                  | <0.001                        | Reference         |
|              |                  | 1–2 years              | 8.51 (8/94; 3.75–16.08)                                                |                               | 1.24 (0.43–3.55)  |
|              |                  | >2 years               | 30.23 (13/43; 17.18–46.13)                                             |                               | 5.76 (2.1–15.76)  |
|              | Sex              | Male                   | 14.68 (16/109; 8.63–22.74)                                             | 0.23                          | Reference         |
|              |                  | Female                 | 9.38 (12/128; 4.94–15.8)                                               |                               | 0.61 (0.27–1.33)  |
| Roe deer     | Total            |                        | 5.48 (8/146; 2.4–10.51)                                                |                               |                   |
|              | Hunting season   | 2017/2018              | 8.33 (3/36; 1.75–22.47)                                                | 0.58                          | Reference         |
|              |                  | 2018/2019              | 4.11 (3/73; 0.86–11.54)                                                |                               | 0.63 (0.1–4)      |
|              |                  | 2019/2020              | 5.41 (2/37; 0.66–18.19)                                                |                               | 0.47 (0.09–2.46)  |
|              |                  | 2020/2021 <sup>b</sup> | nd                                                                     |                               | na                |
|              | Age              | <1 year                | 0 (0/48; 0–7.4)                                                        | 0.02                          | Reference         |
|              |                  | 1–2 years              | 2.94 (1/34; 0.07–15.33)                                                |                               | 1.03 (0.97–1.09)  |
|              |                  | >2 years               | 11.11 (7/63; 4.59–21.56)                                               |                               | 1.13 (1.03–1.23)  |
|              | Sex              | Male                   | 2.08 (1/48; 0.05–11.07)                                                | 0.27                          | Reference         |
|              |                  | Female                 | 7.14 (7/98; 2.92–14.16)                                                |                               | 3.62 (0.43–30.26) |
| Fallow deer  | Total            |                        | 1.96 (1/51; 0.05–10.45)                                                |                               |                   |
|              | Hunting season   | 2017/2018              | nd <sup>c</sup>                                                        | na <sup>c</sup>               | na <sup>c</sup>   |
|              |                  | 2018/2019              | nd <sup>c</sup>                                                        |                               | na <sup>c</sup>   |
|              |                  | 2019/2020              | 2.17 (1/46; 0.06–11.53)                                                |                               | na <sup>c</sup>   |
|              |                  | 2020/2021 <sup>b</sup> | 0 (0/5; 0–52.18)                                                       |                               | na <sup>c</sup>   |
|              | Age <sup>a</sup> | <1 year                | 0 (0/13; 0–24.71)                                                      | 0.59                          | Reference         |
|              |                  | 1–2 years              | 0 (1/17; 0.15–28.69)                                                   |                               | 1.06 (0.94–1.2)   |
|              |                  | >2 years               | 0 (0/21; 0–16.11)                                                      |                               | na                |
|              | Sex <sup>a</sup> | Male                   | 5.56 (1/18; 0.14–27.29)                                                | 0.35                          | Reference         |
|              |                  | Female                 | 0 (0/33; 0–10.58)                                                      |                               | 0.94 (0.84–1.06)  |
| Red deer     | Total            |                        | 1.92 (1/52; 0.05–10.26)                                                |                               |                   |
|              | Hunting season   | 2017/2018              | 0 (0/25; 0–13.72)                                                      | 0.49                          | Reference         |
|              |                  | 2018/2019              | 5.88 (1/17; 0.15–28.69)                                                |                               | 1.06 (0.94–1.2)   |
|              |                  | 2019/2020              | 0 (0/7; 0–40.96)                                                       |                               | na                |
|              |                  | 2020/2021 <sup>b</sup> | 0 (0/3; 0–70.76)                                                       |                               | na                |
|              | Age              | <1 year                | 0 (0/22; 0–15.44)                                                      | 0.58                          | Reference         |
|              |                  | 1–2 years              | 0 (0/10; 0–30.85)                                                      |                               | na                |
|              |                  | >2 years               | 5 (1/20; 0.13–24.87)                                                   |                               | 1.05 (0.95–1.16)  |
|              | Sex              | Male                   | 4 (1/25; 0.1–20.35)                                                    | 0.48                          | Reference         |
|              |                  | Female                 | 0 (0/27; 0–12.77)                                                      |                               | 0.96 (0.89–1.04)  |

Notes: nd, no data; na, not applicable; <sup>a</sup> Sex and age of one fallow deer was not recorded and could therefore not be included in the analysis. <sup>b</sup> Due to the COVID-19 pandemic only few samples could be obtained in the 2020/2021 hunting season. Therefore, the 2020/2021 hunting season was excluded from analysis. <sup>c</sup> Fallow deer was sampled only in two hunting seasons.
