# Supplementary material for: Comparison of Direct and Indirect Toxoplasma gondii Detection and Genotyping in Game: Relationship and Challenges
Source: MDPI journal article supplement (doi:10.3390/microorganisms9081663), 2021-08-04
Supplement: s1 [file s1]

**Table S1.** PCR cycling conditions for PCR-restriction fragment length polymorphism (PCR-RFLP) based *Toxoplasma gondii* genotyping.

| Multiplex Multilocus Nested PCR-RFLP Protocol |                                                    |                                        |  | Singleplex Nested PCR-RFLP Protocol               |              |              |                                        |
|-----------------------------------------------|----------------------------------------------------|----------------------------------------|--|---------------------------------------------------|--------------|--------------|----------------------------------------|
| 1st step: multiplex PCR                       |                                                    |                                        |  | 1st step: singleplex PCR                          |              |              |                                        |
| Initial Denaturation                          | 95 °C, 4 min                                       |                                        |  | 95 °C, 4 min                                      |              |              |                                        |
| Denaturation                                  | 94 °C, 30 s                                        |                                        |  | 94 °C, 30 s                                       |              |              |                                        |
| Annealing                                     | 55 °C, 1 min                                       |                                        |  | 55 °C, 1 min                                      |              |              |                                        |
| Elongation                                    | 72° C, 2 min                                       |                                        |  | 72 °C, 2 min                                      |              |              |                                        |
| No. of cylces                                 | 30                                                 |                                        |  | 35                                                |              |              |                                        |
| Final elongation                              | 72 °C, 5 min                                       |                                        |  | 72 °C, 5 min                                      |              |              |                                        |
| 2nd step: nested PCR                          |                                                    |                                        |  | 2nd step: nested PCR                              |              |              |                                        |
| Template                                      | 1.5 µl of 1:2 diluted PCR product of multiplex PCR |                                        |  | 1.5 µl of undiluted PCR product of singleplex PCR |              |              |                                        |
| Marker                                        | Apico                                              | all other genetic markers <sup>a</sup> |  | SAG3                                              | BTUB, GRA6   | Apico        | all other genetic markers <sup>b</sup> |
| Initial Denaturation                          | 95 °C, 4 min                                       | 95 °C, 4 min                           |  | 95 °C, 5 min                                      | 95 °C, 5 min | 95 °C, 4 min | 95 °C, 4 min                           |
| Denaturation                                  | 94 °C, 30 s                                        | 94 °C, 30 s                            |  | 94 °C, 60 s                                       | 94 °C, 60 s  | 94 °C, 30 s  | 94 °C, 30 s                            |
| Annealing                                     | 55 °C, 1 min                                       | 60 °C, 1 min                           |  | 60 °C, 1 min                                      | 55 °C, 1 min | 55 °C, 1 min | 60 °C, 1 min                           |
| Elongation                                    | 72 °C, 2 min                                       | 72 °C, 1.5 min                         |  | 72 °C, 1 min                                      | 72 °C, 1 min | 72 °C, 2 min | 72 °C, 1.5 min                         |
| No. of cylces                                 | 35                                                 | 35                                     |  | 39                                                | 39           | 39           | 39                                     |
| Final elongation                              | na                                                 | na                                     |  | 72 °C, 5 min                                      | 72 °C, 5 min | 72 °C, 5 min | 72 °C, 5 min                           |

Notes: DreamTaq DNA polymerase (Thermo Fisher Scientific, USA) was used in singleplex and nested PCRs, while FastStart DNA Polymerase (Roche, Switzerland) was used in multiplex PCR.  
<sup>a</sup>SAG1, 5'-SAG2, 3'-SAG2, SAG3, BTUB, GRA6, c22-8, c29-2, L358, PK1, alt.SAG2; <sup>b</sup>SAG1, 5'-SAG2, 3'-SAG2, c22-8, c29-2, L358, PK1, alt.SAG2; na, not applied. .
