# Supplementary material for: Comparison of Direct and Indirect Toxoplasma gondii Detection and Genotyping in Game: Relationship and Challenges
Source: MDPI journal article supplement (doi:10.3390/microorganisms9081663), 2021-08-04
Supplement: s1 [file s1]

**Table S7.** Concordance between DE qPCR, PD qPCR, MC qPCR and ELISA measured in kappa-values ( $\kappa$  (95% CI)) among individuals analysed by all three methods.

| Game Species | DE qPCR vs. ELISA | MC qPCR vs. ELISA | PD qPCR vs. ELISA |
|--------------|-------------------|-------------------|-------------------|
| Wild boar    | 0.46 (0.04–0.88)  | 0.47 (0.07–0.87)  | 0.6 (0.25–0.96)   |
| Roe deer     | 0.6 (-0.07–1)     | 0.33 (-0.41–1)    | 0.6 (-0.07–1)     |
| Fallow deer  | na                | na                | na                |
| Red deer     | na                | 1                 | na                |
| Total        | 0.47 (0.13–0.82)  | 0.5 (0.21–0.8)    | 0.59 (0.29–0.89)  |

Notes: DE qPCR, qPCR on DNA extracts from 5 g of heart muscle tissue; PD qPCR, qPCR on DNA extracts from pepsin digest of 50 g heart muscle tissue; MC qPCR, qPCR on DNA from magnetic capture of 50 g of heart muscle tissue; na, not applicable;  $n = 87$ .
