# Supplementary material for: Comparison of Direct and Indirect Toxoplasma gondii Detection and Genotyping in Game: Relationship and Challenges
Source: MDPI journal article supplement (doi:10.3390/microorganisms9081663), 2021-08-04
Supplement: s1 [file s1]

**Table S5.** Cq-values and corresponding dilution of positively tested heart samples of individuals investigated by three direct detection methods.

| ID     | Game Species | Serostatus | DE qPCR  |           | PD qPCR  |           | MC qPCR  |           |
|--------|--------------|------------|----------|-----------|----------|-----------|----------|-----------|
|        |              |            | Cq-Value | Dilution  | Cq-Value | Dilution  | Cq-Value | Dilution  |
| 18-092 | Wild boar    | negative   | und.     | 1:10 dil. | 29.8     | 1:5 dil.  | und.     | undiluted |
| 18-108 | Wild boar    | negative   | und.     | 1:2 dil.  | 36.3     | 1:5 dil.  | 35.6     | undiluted |
| 18-140 | Wild boar    | positive   | und.     | 1:2 dil.  | 34.4     | 1:5 dil.  | und.     | undiluted |
| 19-278 | Wild boar    | negative   | und.     | 1:5 dil.  | und.     | 1:5 dil.  | 34.4     | undiluted |
| 19-378 | Wild boar    | positive   | und.     | 1:5 dil.  | 33.7     | 1:5 dil.  | 32.2     | undiluted |
| 19-481 | Wild boar    | positive   | 39.7     | 1:2 dil.  | 35.0     | 1:5 dil.  | 35.6     | undiluted |
| 19-491 | Wild boar    | positive   | 35.4     | 1:2 dil.  | 37.1     | 1:5 dil.  | 34       | undiluted |
| 19-275 | Roe deer     | negative   | und.     | undiluted | und.     | 1:5 dil.  | 34.2     | undiluted |
| 19-423 | Roe deer     | positive   | 34       | undiluted | 33.6     | 1:5 dil.  | 30.8     | undiluted |
| 19-375 | Fallow deer  | negative   | und.     | 1:5 dil.  | und.     | 1:10 dil. | 31.3     | undiluted |
| 18-083 | Red deer     | positive   | und.     | 1:10 dil. | und.     | 1:10 dil. | 38.5     | undiluted |

Notes: DE qPCR, qPCR on DNA extracts from 5 g of heart muscle tissue; PD qPCR, qPCR on DNA extracts from pepsin digest of 50 g heart muscle tissue; MC qPCR, qPCR on DNA from magnetic capture of 50 g of heart muscle tissue; und., undetermined; dil., dilution.
